# Supplementary material for: Dynamical differential expression (DyDE) reveals the period control mechanisms of the Arabidopsis circadian oscillator
Source: PLoS Comput Biol. 2019 Jan 31;15(1):e1006674. doi: 10.1371/journal.pcbi.1006674 (PMC6377142; doi:10.1371/journal.pcbi.1006674)
Supplement: S2 Table — The tables list the most enriched terms in the rhythmic transcripts, split in to the three ontologies: Biological process, Molecular function, and Cellular component. The analysis is split in eight categories, each corresponding to a column in the table: GO term (unique identifier in the GO database), GO description, p-value (likelihood of enrichment), False Discovery Rate q-value, a measure of Enrichment, a link to the full list of enriched genes, and whether the GO term is also enriched in the NAM datasets. (XLSX) [file pcbi.1006674.s012.xlsx]

## Sheet: Process
GO term	Description	P-value	FDR q-value	Enrichment (N, B, n, b)	Genes	NAM
GO:0044711	single-organism biosynthetic process	2.05e-22	4.8e-19	1.69 (12061,1130,1868,295)	[+] Show genes	YES
GO:0044281	small molecule metabolic process	3.15e-22	3.68e-19	1.77 (12061,914,1868,251)	[+] Show genes	NO
GO:0044283	small molecule biosynthetic process	4.51e-22	3.51e-19	2.17 (12061,444,1868,149)	[+] Show genes	YES
GO:0044710	single-organism metabolic process	1.05e-21	6.12e-19	1.48 (12061,1952,1868,448)	[+] Show genes	YES
GO:1901700	response to oxygen-containing compound	7.14e-19	3.33e-16	1.81 (12061,708,1868,199)	[+] Show genes	YES
GO:0048511	rhythmic process	4.07e-18	1.58e-15	5.00 (12061,40,1868,31)	[+] Show genes	YES
GO:0007623	circadian rhythm	4.07e-18	1.36e-15	5.00 (12061,40,1868,31)	[+] Show genes	YES
GO:0010264	myo-inositol hexakisphosphate biosynthetic process	7.33e-18	2.14e-15	5.20 (12061,36,1868,29)	[+] Show genes	YES
GO:0032958	inositol phosphate biosynthetic process	7.33e-18	1.9e-15	5.20 (12061,36,1868,29)	[+] Show genes	YES
GO:0033517	myo-inositol hexakisphosphate metabolic process	7.33e-18	1.71e-15	5.20 (12061,36,1868,29)	[+] Show genes	YES
GO:0046173	polyol biosynthetic process	7.33e-18	1.56e-15	5.20 (12061,36,1868,29)	[+] Show genes	YES
GO:0044699	single-organism process	8.78e-18	1.71e-15	1.30 (12061,3380,1868,679)	[+] Show genes	NO
GO:1901564	organonitrogen compound metabolic process	1.54e-17	2.77e-15	1.95 (12061,504,1868,152)	[+] Show genes	NO
GO:1901615	organic hydroxy compound metabolic process	2.54e-16	4.23e-14	2.28 (12061,275,1868,97)	[+] Show genes	YES
GO:0042221	response to chemical	3.66e-16	5.69e-14	1.56 (12061,1155,1868,279)	[+] Show genes	YES
GO:0043436	oxoacid metabolic process	5.71e-16	8.33e-14	1.82 (12061,589,1868,166)	[+] Show genes	NO
GO:0006082	organic acid metabolic process	5.71e-16	7.84e-14	1.82 (12061,589,1868,166)	[+] Show genes	NO
GO:0042440	pigment metabolic process	9.97e-16	1.29e-13	3.20 (12061,101,1868,50)	[+] Show genes	NO
GO:1901617	organic hydroxy compound biosynthetic process	1.05e-15	1.3e-13	2.46 (12061,207,1868,79)	[+] Show genes	YES
GO:0051186	cofactor metabolic process	1.82e-15	2.13e-13	2.62 (12061,170,1868,69)	[+] Show genes	NO
GO:0019752	carboxylic acid metabolic process	2.07e-15	2.3e-13	1.80 (12061,587,1868,164)	[+] Show genes	NO
GO:0050896	response to stimulus	2.49e-15	2.64e-13	1.38 (12061,2107,1868,449)	[+] Show genes	YES
GO:0019252	starch biosynthetic process	4.31e-15	4.37e-13	3.48 (12061,78,1868,42)	[+] Show genes	NO
GO:0044763	single-organism cellular process	5.35e-15	5.2e-13	1.35 (12061,2299,1868,481)	[+] Show genes	NO
GO:0019751	polyol metabolic process	6.5e-15	6.07e-13	3.99 (12061,55,1868,34)	[+] Show genes	YES
GO:0005982	starch metabolic process	1.13e-14	1.02e-12	3.30 (12061,86,1868,44)	[+] Show genes	YES
GO:0000023	maltose metabolic process	1.71e-14	1.48e-12	3.55 (12061,71,1868,39)	[+] Show genes	NO
GO:0043647	inositol phosphate metabolic process	1.76e-14	1.46e-12	4.17 (12061,48,1868,31)	[+] Show genes	YES
GO:0010033	response to organic substance	2.08e-14	1.68e-12	1.64 (12061,825,1868,209)	[+] Show genes	YES
GO:1901576	organic substance biosynthetic process	2.37e-14	1.84e-12	1.45 (12061,1456,1868,328)	[+] Show genes	YES
GO:0009719	response to endogenous stimulus	1.24e-13	9.32e-12	1.83 (12061,487,1868,138)	[+] Show genes	YES
GO:0072524	pyridine-containing compound metabolic process	1.25e-13	9.09e-12	3.58 (12061,65,1868,36)	[+] Show genes	NO
GO:0001101	response to acid	1.35e-13	9.53e-12	1.95 (12061,385,1868,116)	[+] Show genes	YES
GO:0006739	NADP metabolic process	4.54e-13	3.11e-11	3.53 (12061,64,1868,35)	[+] Show genes	NO
GO:0006740	NADPH regeneration	4.54e-13	3.03e-11	3.53 (12061,64,1868,35)	[+] Show genes	NO
GO:0006098	pentose-phosphate shunt	4.54e-13	2.94e-11	3.53 (12061,64,1868,35)	[+] Show genes	NO
GO:0019362	pyridine nucleotide metabolic process	4.54e-13	2.86e-11	3.53 (12061,64,1868,35)	[+] Show genes	NO
GO:0046496	nicotinamide nucleotide metabolic process	4.54e-13	2.79e-11	3.53 (12061,64,1868,35)	[+] Show genes	NO
GO:0006733	oxidoreduction coenzyme metabolic process	5.61e-13	3.36e-11	3.27 (12061,77,1868,39)	[+] Show genes	NO
GO:0005984	disaccharide metabolic process	1.37e-12	7.98e-11	3.15 (12061,82,1868,40)	[+] Show genes	NO
GO:0009058	biosynthetic process	1.4e-12	7.95e-11	1.40 (12061,1560,1868,339)	[+] Show genes	YES
GO:0006073	cellular glucan metabolic process	2.1e-12	1.16e-10	2.62 (12061,133,1868,54)	[+] Show genes	YES
GO:0044042	glucan metabolic process	2.1e-12	1.14e-10	2.62 (12061,133,1868,54)	[+] Show genes	YES
GO:0008152	metabolic process	2.66e-12	1.41e-10	1.25 (12061,3258,1868,629)	[+] Show genes	YES
GO:0009605	response to external stimulus	3.68e-12	1.91e-10	1.69 (12061,591,1868,155)	[+] Show genes	YES
GO:0016053	organic acid biosynthetic process	3.91e-12	1.98e-10	1.99 (12061,311,1868,96)	[+] Show genes	YES
GO:0046394	carboxylic acid biosynthetic process	3.91e-12	1.94e-10	1.99 (12061,311,1868,96)	[+] Show genes	YES
GO:0006066	alcohol metabolic process	7.11e-12	3.46e-10	2.44 (12061,156,1868,59)	[+] Show genes	NO
GO:0046148	pigment biosynthetic process	7.17e-12	3.41e-10	3.23 (12061,72,1868,36)	[+] Show genes	NO
GO:0046165	alcohol biosynthetic process	7.97e-12	3.72e-10	2.57 (12061,133,1868,53)	[+] Show genes	NO
GO:0006732	coenzyme metabolic process	1.08e-11	4.93e-10	2.69 (12061,115,1868,48)	[+] Show genes	NO
GO:0019320	hexose catabolic process	1.76e-11	7.9e-10	2.83 (12061,98,1868,43)	[+] Show genes	NO
GO:0046365	monosaccharide catabolic process	1.76e-11	7.75e-10	2.83 (12061,98,1868,43)	[+] Show genes	NO
GO:0006790	sulfur compound metabolic process	1.76e-11	7.63e-10	2.44 (12061,151,1868,57)	[+] Show genes	NO
GO:0019748	secondary metabolic process	1.78e-11	7.57e-10	2.40 (12061,159,1868,59)	[+] Show genes	NO
GO:0009311	oligosaccharide metabolic process	2.31e-11	9.63e-10	2.93 (12061,88,1868,40)	[+] Show genes	YES
GO:0006007	glucose catabolic process	3.39e-11	1.39e-09	2.82 (12061,96,1868,42)	[+] Show genes	NO
GO:0009725	response to hormone	3.51e-11	1.41e-09	1.85 (12061,373,1868,107)	[+] Show genes	YES
GO:0016143	S-glycoside metabolic process	4.63e-11	1.83e-09	3.71 (12061,47,1868,27)	[+] Show genes	NO
GO:0019760	glucosinolate metabolic process	4.63e-11	1.8e-09	3.71 (12061,47,1868,27)	[+] Show genes	NO
GO:0019757	glycosinolate metabolic process	4.63e-11	1.77e-09	3.71 (12061,47,1868,27)	[+] Show genes	NO
GO:0006796	phosphate-containing compound metabolic process	5.63e-11	2.12e-09	1.62 (12061,636,1868,160)	[+] Show genes	NO
GO:0032787	monocarboxylic acid metabolic process	7.68e-11	2.85e-09	1.80 (12061,406,1868,113)	[+] Show genes	NO
GO:0043207	response to external biotic stimulus	8.76e-11	3.2e-09	1.77 (12061,426,1868,117)	[+] Show genes	YES
GO:0009607	response to biotic stimulus	8.76e-11	3.15e-09	1.77 (12061,426,1868,117)	[+] Show genes	YES
GO:0009250	glucan biosynthetic process	9.69e-11	3.43e-09	2.68 (12061,106,1868,44)	[+] Show genes	NO
GO:0033993	response to lipid	9.9e-11	3.45e-09	2.29 (12061,169,1868,60)	[+] Show genes	YES
GO:0044712	single-organism catabolic process	1.03e-10	3.53e-09	1.77 (12061,427,1868,117)	[+] Show genes	NO
GO:0006793	phosphorus metabolic process	1.17e-10	3.94e-09	1.60 (12061,657,1868,163)	[+] Show genes	NO
GO:0009411	response to UV	1.75e-10	5.82e-09	3.65 (12061,46,1868,26)	[+] Show genes	YES
GO:0009987	cellular process	3.68e-10	1.21e-08	1.20 (12061,3621,1868,675)	[+] Show genes	YES
GO:0019637	organophosphate metabolic process	4.98e-10	1.62e-08	1.76 (12061,408,1868,111)	[+] Show genes	YES
GO:0009628	response to abiotic stimulus	5.48e-10	1.75e-08	1.53 (12061,753,1868,179)	[+] Show genes	YES
GO:0010224	response to UV-B	6.31e-10	1.99e-08	4.38 (12061,28,1868,19)	[+] Show genes	YES
GO:0006520	cellular amino acid metabolic process	6.64e-10	2.07e-08	2.02 (12061,237,1868,74)	[+] Show genes	NO
GO:1901565	organonitrogen compound catabolic process	7.82e-10	2.4e-08	2.71 (12061,93,1868,39)	[+] Show genes	NO
GO:0080167	response to karrikin	7.91e-10	2.4e-08	3.23 (12061,58,1868,29)	[+] Show genes	YES
GO:0016109	tetraterpenoid biosynthetic process	1.09e-09	3.27e-08	4.47 (12061,26,1868,18)	[+] Show genes	NO
GO:0016108	tetraterpenoid metabolic process	1.09e-09	3.22e-08	4.47 (12061,26,1868,18)	[+] Show genes	NO
GO:0016116	carotenoid metabolic process	1.09e-09	3.18e-08	4.47 (12061,26,1868,18)	[+] Show genes	NO
GO:0016117	carotenoid biosynthetic process	1.09e-09	3.14e-08	4.47 (12061,26,1868,18)	[+] Show genes	NO
GO:0044272	sulfur compound biosynthetic process	1.19e-09	3.38e-08	2.34 (12061,141,1868,51)	[+] Show genes	NO
GO:0048583	regulation of response to stimulus	2.21e-09	6.21e-08	2.10 (12061,194,1868,63)	[+] Show genes	YES
GO:0016144	S-glycoside biosynthetic process	2.43e-09	6.77e-08	3.62 (12061,41,1868,23)	[+] Show genes	NO
GO:0019758	glycosinolate biosynthetic process	2.43e-09	6.69e-08	3.62 (12061,41,1868,23)	[+] Show genes	NO
GO:0019761	glucosinolate biosynthetic process	2.43e-09	6.61e-08	3.62 (12061,41,1868,23)	[+] Show genes	NO
GO:0010941	regulation of cell death	2.97e-09	7.96e-08	2.45 (12061,116,1868,44)	[+] Show genes	YES
GO:0043067	regulation of programmed cell death	2.97e-09	7.87e-08	2.45 (12061,116,1868,44)	[+] Show genes	YES
GO:0071704	organic substance metabolic process	3.48e-09	9.12e-08	1.22 (12061,3016,1868,569)	[+] Show genes	YES
GO:0051707	response to other organism	3.83e-09	9.94e-08	1.76 (12061,363,1868,99)	[+] Show genes	YES
GO:0097305	response to alcohol	3.86e-09	9.89e-08	2.31 (12061,137,1868,49)	[+] Show genes	YES
GO:0002682	regulation of immune system process	4.07e-09	1.03e-07	2.40 (12061,121,1868,45)	[+] Show genes	YES
GO:0045088	regulation of innate immune response	4.07e-09	1.02e-07	2.40 (12061,121,1868,45)	[+] Show genes	YES
GO:0050776	regulation of immune response	4.07e-09	1.01e-07	2.40 (12061,121,1868,45)	[+] Show genes	YES
GO:1901659	glycosyl compound biosynthetic process	4.31e-09	1.06e-07	3.44 (12061,45,1868,24)	[+] Show genes	NO
GO:0044237	cellular metabolic process	4.88e-09	1.19e-07	1.23 (12061,2835,1868,538)	[+] Show genes	YES
GO:0015994	chlorophyll metabolic process	5.09e-09	1.23e-07	3.17 (12061,55,1868,27)	[+] Show genes	NO
GO:0044550	secondary metabolite biosynthetic process	5.38e-09	1.28e-07	2.67 (12061,87,1868,36)	[+] Show genes	NO
GO:0098542	defense response to other organism	5.51e-09	1.3e-07	1.92 (12061,252,1868,75)	[+] Show genes	YES
GO:0010207	photosystem II assembly	7.7e-09	1.8e-07	3.37 (12061,46,1868,24)	[+] Show genes	NO
GO:0051234	establishment of localization	9.34e-09	2.16e-07	1.38 (12061,1173,1868,251)	[+] Show genes	NO
GO:0031347	regulation of defense response	9.65e-09	2.21e-07	2.13 (12061,170,1868,56)	[+] Show genes	YES
GO:0051704	multi-organism process	9.85e-09	2.23e-07	1.73 (12061,374,1868,100)	[+] Show genes	YES
GO:0010363	regulation of plant-type hypersensitive response	1e-08	2.25e-07	2.42 (12061,112,1868,42)	[+] Show genes	YES
GO:0006612	protein targeting to membrane	1e-08	2.23e-07	2.42 (12061,112,1868,42)	[+] Show genes	YES
GO:0090150	establishment of protein localization to membrane	1e-08	2.21e-07	2.42 (12061,112,1868,42)	[+] Show genes	YES
GO:0005976	polysaccharide metabolic process	1.01e-08	2.2e-07	1.92 (12061,246,1868,73)	[+] Show genes	NO
GO:0055114	oxidation-reduction process	1.22e-08	2.64e-07	2.11 (12061,171,1868,56)	[+] Show genes	NO
GO:0080135	regulation of cellular response to stress	1.36e-08	2.9e-07	2.37 (12061,117,1868,43)	[+] Show genes	YES
GO:0009814	defense response, incompatible interaction	1.36e-08	2.89e-07	2.40 (12061,113,1868,42)	[+] Show genes	YES
GO:0080134	regulation of response to stress	1.79e-08	3.76e-07	2.08 (12061,177,1868,57)	[+] Show genes	YES
GO:0034285	response to disaccharide	2.17e-08	4.53e-07	3.01 (12061,58,1868,27)	[+] Show genes	YES
GO:0009744	response to sucrose	2.17e-08	4.49e-07	3.01 (12061,58,1868,27)	[+] Show genes	YES
GO:0019318	hexose metabolic process	2.21e-08	4.53e-07	2.17 (12061,152,1868,51)	[+] Show genes	NO
GO:1901135	carbohydrate derivative metabolic process	2.23e-08	4.53e-07	1.83 (12061,283,1868,80)	[+] Show genes	NO
GO:0006081	cellular aldehyde metabolic process	2.3e-08	4.63e-07	2.29 (12061,127,1868,45)	[+] Show genes	NO
GO:0044264	cellular polysaccharide metabolic process	2.59e-08	5.16e-07	1.93 (12061,228,1868,68)	[+] Show genes	NO
GO:0048878	chemical homeostasis	2.64e-08	5.21e-07	3.30 (12061,45,1868,23)	[+] Show genes	NO
GO:0005975	carbohydrate metabolic process	2.69e-08	5.28e-07	1.53 (12061,610,1868,145)	[+] Show genes	NO
GO:1901605	alpha-amino acid metabolic process	2.87e-08	5.59e-07	2.10 (12061,166,1868,54)	[+] Show genes	NO
GO:0009072	aromatic amino acid family metabolic process	2.97e-08	5.73e-07	2.74 (12061,73,1868,31)	[+] Show genes	NO
GO:0005996	monosaccharide metabolic process	3.62e-08	6.92e-07	2.09 (12061,167,1868,54)	[+] Show genes	NO
GO:1901362	organic cyclic compound biosynthetic process	3.94e-08	7.47e-07	1.60 (12061,479,1868,119)	[+] Show genes	NO
GO:1901657	glycosyl compound metabolic process	4.96e-08	9.34e-07	2.79 (12061,67,1868,29)	[+] Show genes	NO
GO:0050801	ion homeostasis	5.18e-08	9.67e-07	3.30 (12061,43,1868,22)	[+] Show genes	NO
GO:0072330	monocarboxylic acid biosynthetic process	5.78e-08	1.07e-06	2.11 (12061,156,1868,51)	[+] Show genes	YES
GO:0009627	systemic acquired resistance	6.1e-08	1.12e-06	2.44 (12061,98,1868,37)	[+] Show genes	NO
GO:0044262	cellular carbohydrate metabolic process	6.25e-08	1.14e-06	1.84 (12061,256,1868,73)	[+] Show genes	NO
GO:0055080	cation homeostasis	6.32e-08	1.14e-06	3.49 (12061,37,1868,20)	[+] Show genes	NO
GO:0010035	response to inorganic substance	7.34e-08	1.32e-06	1.65 (12061,403,1868,103)	[+] Show genes	YES
GO:1901566	organonitrogen compound biosynthetic process	7.37e-08	1.31e-06	1.73 (12061,324,1868,87)	[+] Show genes	NO
GO:0043085	positive regulation of catalytic activity	8.85e-08	1.56e-06	3.23 (12061,44,1868,22)	[+] Show genes	NO
GO:0044093	positive regulation of molecular function	8.85e-08	1.55e-06	3.23 (12061,44,1868,22)	[+] Show genes	NO
GO:0009813	flavonoid biosynthetic process	1.14e-07	1.99e-06	3.40 (12061,38,1868,20)	[+] Show genes	YES
GO:0009069	serine family amino acid metabolic process	1.23e-07	2.12e-06	2.81 (12061,62,1868,27)	[+] Show genes	NO
GO:0065008	regulation of biological quality	1.4e-07	2.41e-06	1.82 (12061,256,1868,72)	[+] Show genes	NO
GO:0000271	polysaccharide biosynthetic process	1.42e-07	2.41e-06	1.90 (12061,214,1868,63)	[+] Show genes	NO
GO:0016052	carbohydrate catabolic process	1.71e-07	2.89e-06	2.08 (12061,152,1868,49)	[+] Show genes	NO
GO:0010817	regulation of hormone levels	1.92e-07	3.23e-06	2.29 (12061,110,1868,39)	[+] Show genes	NO
GO:0019682	glyceraldehyde-3-phosphate metabolic process	1.94e-07	3.23e-06	2.52 (12061,82,1868,32)	[+] Show genes	NO
GO:0019288	isopentenyl diphosphate biosynthetic process, methylerythritol 4-phosphate pathway	1.94e-07	3.21e-06	2.52 (12061,82,1868,32)	[+] Show genes	NO
GO:0009240	isopentenyl diphosphate biosynthetic process	1.94e-07	3.19e-06	2.52 (12061,82,1868,32)	[+] Show genes	NO
GO:0046490	isopentenyl diphosphate metabolic process	1.94e-07	3.16e-06	2.52 (12061,82,1868,32)	[+] Show genes	NO
GO:0009070	serine family amino acid biosynthetic process	1.99e-07	3.23e-06	2.88 (12061,56,1868,25)	[+] Show genes	NO
GO:0009812	flavonoid metabolic process	2e-07	3.22e-06	3.31 (12061,39,1868,20)	[+] Show genes	YES
GO:0044724	single-organism carbohydrate catabolic process	2e-07	3.2e-06	2.11 (12061,144,1868,47)	[+] Show genes	NO
GO:0006778	porphyrin-containing compound metabolic process	2.07e-07	3.29e-06	2.70 (12061,67,1868,28)	[+] Show genes	NO
GO:0033013	tetrapyrrole metabolic process	2.07e-07	3.27e-06	2.70 (12061,67,1868,28)	[+] Show genes	NO
GO:0008652	cellular amino acid biosynthetic process	2.33e-07	3.65e-06	2.08 (12061,149,1868,48)	[+] Show genes	NO
GO:0044723	single-organism carbohydrate metabolic process	2.43e-07	3.78e-06	1.54 (12061,515,1868,123)	[+] Show genes	NO
GO:0019684	photosynthesis, light reaction	2.44e-07	3.77e-06	3.83 (12061,27,1868,16)	[+] Show genes	NO
GO:0006090	pyruvate metabolic process	2.69e-07	4.13e-06	2.49 (12061,83,1868,32)	[+] Show genes	NO
GO:0002376	immune system process	3.08e-07	4.7e-06	1.83 (12061,237,1868,67)	[+] Show genes	YES
GO:0006810	transport	3.8e-07	5.75e-06	1.34 (12061,1148,1868,238)	[+] Show genes	NO
GO:0065007	biological regulation	3.82e-07	5.76e-06	1.28 (12061,1607,1868,318)	[+] Show genes	NO
GO:0019344	cysteine biosynthetic process	3.87e-07	5.79e-06	2.87 (12061,54,1868,24)	[+] Show genes	NO
GO:0090407	organophosphate biosynthetic process	4.21e-07	6.25e-06	1.67 (12061,341,1868,88)	[+] Show genes	YES
GO:0006006	glucose metabolic process	4.7e-07	6.94e-06	2.09 (12061,139,1868,45)	[+] Show genes	NO
GO:0042537	benzene-containing compound metabolic process	5.09e-07	7.47e-06	2.39 (12061,89,1868,33)	[+] Show genes	NO
GO:0045087	innate immune response	5.73e-07	8.37e-06	1.96 (12061,171,1868,52)	[+] Show genes	NO
GO:0006534	cysteine metabolic process	5.86e-07	8.49e-06	2.82 (12061,55,1868,24)	[+] Show genes	NO
GO:1901360	organic cyclic compound metabolic process	6.16e-07	8.88e-06	1.32 (12061,1240,1868,253)	[+] Show genes	YES
GO:0009415	response to water	6.71e-07	9.61e-06	2.48 (12061,78,1868,30)	[+] Show genes	YES
GO:0019725	cellular homeostasis	7.76e-07	1.1e-05	3.32 (12061,35,1868,18)	[+] Show genes	NO
GO:0009737	response to abscisic acid	8.37e-07	1.18e-05	2.26 (12061,103,1868,36)	[+] Show genes	YES
GO:0006873	cellular ion homeostasis	8.67e-07	1.22e-05	3.43 (12061,32,1868,17)	[+] Show genes	NO
GO:0030003	cellular cation homeostasis	8.67e-07	1.21e-05	3.43 (12061,32,1868,17)	[+] Show genes	NO
GO:0055082	cellular chemical homeostasis	8.67e-07	1.2e-05	3.43 (12061,32,1868,17)	[+] Show genes	NO
GO:0009637	response to blue light	8.92e-07	1.23e-05	4.73 (12061,15,1868,11)	[+] Show genes	NO
GO:0009414	response to water deprivation	9.01e-07	1.24e-05	2.50 (12061,75,1868,29)	[+] Show genes	YES
GO:0033692	cellular polysaccharide biosynthetic process	9.12e-07	1.25e-05	1.86 (12061,201,1868,58)	[+] Show genes	NO
GO:0050790	regulation of catalytic activity	1.16e-06	1.57e-05	2.56 (12061,68,1868,27)	[+] Show genes	NO
GO:1901606	alpha-amino acid catabolic process	1.2e-06	1.61e-05	2.95 (12061,46,1868,21)	[+] Show genes	NO
GO:0009063	cellular amino acid catabolic process	1.2e-06	1.61e-05	2.95 (12061,46,1868,21)	[+] Show genes	NO
GO:0009743	response to carbohydrate	1.22e-06	1.63e-05	2.32 (12061,92,1868,33)	[+] Show genes	NO
GO:0006955	immune response	1.26e-06	1.67e-05	1.92 (12061,175,1868,52)	[+] Show genes	YES
GO:0009657	plastid organization	1.66e-06	2.19e-05	2.32 (12061,89,1868,32)	[+] Show genes	NO
GO:0034637	cellular carbohydrate biosynthetic process	1.93e-06	2.53e-05	1.81 (12061,210,1868,59)	[+] Show genes	NO
GO:0016556	mRNA modification	2.25e-06	2.94e-05	2.49 (12061,70,1868,27)	[+] Show genes	NO
GO:0044765	single-organism transport	2.57e-06	3.33e-05	1.33 (12061,1039,1868,214)	[+] Show genes	NO
GO:0010027	thylakoid membrane organization	2.9e-06	3.73e-05	2.56 (12061,63,1868,25)	[+] Show genes	NO
GO:0009668	plastid membrane organization	2.9e-06	3.71e-05	2.56 (12061,63,1868,25)	[+] Show genes	NO
GO:0016051	carbohydrate biosynthetic process	3.13e-06	3.99e-05	1.67 (12061,286,1868,74)	[+] Show genes	NO
GO:0044802	single-organism membrane organization	4.06e-06	5.15e-05	2.52 (12061,64,1868,25)	[+] Show genes	NO
GO:0065009	regulation of molecular function	4.08e-06	5.15e-05	2.31 (12061,84,1868,30)	[+] Show genes	NO
GO:0009965	leaf morphogenesis	4.36e-06	5.47e-05	3.14 (12061,35,1868,17)	[+] Show genes	NO
GO:0014070	response to organic cyclic compound	4.75e-06	5.93e-05	1.74 (12061,230,1868,62)	[+] Show genes	YES
GO:0044249	cellular biosynthetic process	4.98e-06	6.18e-05	1.27 (12061,1382,1868,272)	[+] Show genes	YES
GO:0006811	ion transport	5.21e-06	6.44e-05	1.57 (12061,371,1868,90)	[+] Show genes	NO
GO:0009739	response to gibberellin	5.72e-06	7.02e-05	2.98 (12061,39,1868,18)	[+] Show genes	NO
GO:0061024	membrane organization	7.75e-06	9.47e-05	2.45 (12061,66,1868,25)	[+] Show genes	NO
GO:0019438	aromatic compound biosynthetic process	8.46e-06	0.000103	1.53 (12061,396,1868,94)	[+] Show genes	NO
GO:0050832	defense response to fungus	1e-05	0.000121	2.29 (12061,79,1868,28)	[+] Show genes	NO
GO:0042546	cell wall biogenesis	1.02e-05	0.000123	2.52 (12061,59,1868,23)	[+] Show genes	NO
GO:0009753	response to jasmonic acid	1.05e-05	0.000126	2.15 (12061,96,1868,32)	[+] Show genes	NO
GO:0006766	vitamin metabolic process	1.1e-05	0.000131	4.30 (12061,15,1868,10)	[+] Show genes	NO
GO:0009902	chloroplast relocation	1.18e-05	0.00014	3.35 (12061,27,1868,14)	[+] Show genes	NO
GO:0051656	establishment of organelle localization	1.18e-05	0.000139	3.35 (12061,27,1868,14)	[+] Show genes	NO
GO:0051667	establishment of plastid localization	1.18e-05	0.000139	3.35 (12061,27,1868,14)	[+] Show genes	NO
GO:0006970	response to osmotic stress	1.24e-05	0.000145	1.83 (12061,169,1868,48)	[+] Show genes	NO
GO:0010038	response to metal ion	1.57e-05	0.000182	1.89 (12061,147,1868,43)	[+] Show genes	NO
GO:0008610	lipid biosynthetic process	1.68e-05	0.000194	1.53 (12061,371,1868,88)	[+] Show genes	NO
GO:0006725	cellular aromatic compound metabolic process	1.7e-05	0.000195	1.28 (12061,1165,1868,231)	[+] Show genes	YES
GO:0006807	nitrogen compound metabolic process	2.13e-05	0.000244	1.28 (12061,1163,1868,230)	[+] Show genes	YES
GO:0009697	salicylic acid biosynthetic process	2.54e-05	0.000289	2.31 (12061,70,1868,25)	[+] Show genes	NO
GO:0009696	salicylic acid metabolic process	2.54e-05	0.000288	2.31 (12061,70,1868,25)	[+] Show genes	NO
GO:0006820	anion transport	3.04e-05	0.000343	1.66 (12061,233,1868,60)	[+] Show genes	NO
GO:1901698	response to nitrogen compound	3.17e-05	0.000355	1.58 (12061,299,1868,73)	[+] Show genes	YES
GO:0009416	response to light stimulus	3.26e-05	0.000364	1.59 (12061,289,1868,71)	[+] Show genes	YES
GO:0006787	porphyrin-containing compound catabolic process	3.37e-05	0.000374	3.12 (12061,29,1868,14)	[+] Show genes	NO
GO:0015996	chlorophyll catabolic process	3.37e-05	0.000372	3.12 (12061,29,1868,14)	[+] Show genes	NO
GO:0033015	tetrapyrrole catabolic process	3.37e-05	0.000371	3.12 (12061,29,1868,14)	[+] Show genes	NO
GO:0046149	pigment catabolic process	3.37e-05	0.000369	3.12 (12061,29,1868,14)	[+] Show genes	NO
GO:0051187	cofactor catabolic process	3.37e-05	0.000367	3.12 (12061,29,1868,14)	[+] Show genes	NO
GO:0035556	intracellular signal transduction	3.66e-05	0.000397	2.06 (12061,97,1868,31)	[+] Show genes	NO
GO:0046686	response to cadmium ion	3.73e-05	0.000404	1.93 (12061,124,1868,37)	[+] Show genes	NO
GO:0009620	response to fungus	3.8e-05	0.000409	1.97 (12061,115,1868,35)	[+] Show genes	NO
GO:0071229	cellular response to acid	4.18e-05	0.000447	1.79 (12061,162,1868,45)	[+] Show genes	YES
GO:0006091	generation of precursor metabolites and energy	4.67e-05	0.000498	1.99 (12061,107,1868,33)	[+] Show genes	NO
GO:0042430	indole-containing compound metabolic process	5.42e-05	0.000575	3.01 (12061,30,1868,14)	[+] Show genes	NO
GO:0042402	cellular biogenic amine catabolic process	5.42e-05	0.000572	3.01 (12061,30,1868,14)	[+] Show genes	NO
GO:0009310	amine catabolic process	5.42e-05	0.000569	3.01 (12061,30,1868,14)	[+] Show genes	NO
GO:1901575	organic substance catabolic process	5.49e-05	0.000575	1.40 (12061,544,1868,118)	[+] Show genes	NO
GO:1901607	alpha-amino acid biosynthetic process	5.66e-05	0.000589	1.93 (12061,117,1868,35)	[+] Show genes	NO
GO:0009751	response to salicylic acid	5.66e-05	0.000587	1.93 (12061,117,1868,35)	[+] Show genes	YES
GO:0046189	phenol-containing compound biosynthetic process	5.7e-05	0.000589	2.21 (12061,73,1868,25)	[+] Show genes	NO
GO:0042445	hormone metabolic process	5.92e-05	0.000609	2.10 (12061,86,1868,28)	[+] Show genes	NO
GO:0023014	signal transduction by phosphorylation	6.2e-05	0.000634	2.58 (12061,45,1868,18)	[+] Show genes	NO
GO:0000165	MAPK cascade	6.2e-05	0.000631	2.58 (12061,45,1868,18)	[+] Show genes	NO
GO:0009963	positive regulation of flavonoid biosynthetic process	6.47e-05	0.000656	2.50 (12061,49,1868,19)	[+] Show genes	NO
GO:0009074	aromatic amino acid family catabolic process	6.67e-05	0.000674	3.11 (12061,27,1868,13)	[+] Show genes	NO
GO:0009056	catabolic process	7.92e-05	0.000797	1.36 (12061,637,1868,134)	[+] Show genes	NO
GO:0015698	inorganic anion transport	8.66e-05	0.000868	1.98 (12061,101,1868,31)	[+] Show genes	NO
GO:0009110	vitamin biosynthetic process	8.99e-05	0.000896	4.30 (12061,12,1868,8)	[+] Show genes	NO
GO:0015706	nitrate transport	9.35e-05	0.000929	2.05 (12061,88,1868,28)	[+] Show genes	NO
GO:0018958	phenol-containing compound metabolic process	9.44e-05	0.000933	2.15 (12061,75,1868,25)	[+] Show genes	NO
GO:0042592	homeostatic process	9.44e-05	0.000929	2.15 (12061,75,1868,25)	[+] Show genes	NO
GO:0006629	lipid metabolic process	0.000101	0.000987	1.40 (12061,502,1868,109)	[+] Show genes	NO
GO:1901701	cellular response to oxygen-containing compound	0.000102	0.000992	1.65 (12061,207,1868,53)	[+] Show genes	YES
GO:0010155	regulation of proton transport	0.000102	0.000995	3.59 (12061,18,1868,10)	[+] Show genes	NO
GO:0046283	anthocyanin-containing compound metabolic process	0.000103	0.001	3.87 (12061,15,1868,9)	[+] Show genes	NO
GO:0009718	anthocyanin-containing compound biosynthetic process	0.000103	0.000997	3.87 (12061,15,1868,9)	[+] Show genes	NO
GO:0032870	cellular response to hormone stimulus	0.000105	0.00101	1.74 (12061,163,1868,44)	[+] Show genes	NO
GO:0009651	response to salt stress	0.000105	0.00101	1.74 (12061,163,1868,44)	[+] Show genes	NO
GO:0009755	hormone-mediated signaling pathway	0.000117	0.00111	1.76 (12061,154,1868,42)	[+] Show genes	NO
GO:0010167	response to nitrate	0.000128	0.00121	2.05 (12061,85,1868,27)	[+] Show genes	NO
GO:0015995	chlorophyll biosynthetic process	0.000133	0.00125	3.10 (12061,25,1868,12)	[+] Show genes	NO
GO:0009658	chloroplast organization	0.000138	0.0013	2.18 (12061,68,1868,23)	[+] Show genes	NO
GO:0071495	cellular response to endogenous stimulus	0.000143	0.00134	1.72 (12061,165,1868,44)	[+] Show genes	NO
GO:0034754	cellular hormone metabolic process	0.000164	0.00153	2.49 (12061,44,1868,17)	[+] Show genes	NO
GO:0046777	protein autophosphorylation	0.000166	0.00154	2.42 (12061,48,1868,18)	[+] Show genes	NO
GO:0071705	nitrogen compound transport	0.000173	0.0016	1.46 (12061,362,1868,82)	[+] Show genes	NO
GO:0000096	sulfur amino acid metabolic process	0.000191	0.00177	1.91 (12061,105,1868,31)	[+] Show genes	NO
GO:0006644	phospholipid metabolic process	0.000194	0.00179	1.69 (12061,172,1868,45)	[+] Show genes	NO
GO:0009683	indoleacetic acid metabolic process	0.000212	0.00194	2.98 (12061,26,1868,12)	[+] Show genes	NO
GO:0009684	indoleacetic acid biosynthetic process	0.000212	0.00193	2.98 (12061,26,1868,12)	[+] Show genes	NO
GO:0009308	amine metabolic process	0.00022	0.00199	2.31 (12061,53,1868,19)	[+] Show genes	NO
GO:0009314	response to radiation	0.000228	0.00206	1.49 (12061,317,1868,73)	[+] Show genes	NO
GO:0006950	response to stress	0.000233	0.0021	1.24 (12061,1165,1868,223)	[+] Show genes	YES
GO:0042446	hormone biosynthetic process	0.000239	0.00215	2.04 (12061,79,1868,25)	[+] Show genes	NO
GO:0000097	sulfur amino acid biosynthetic process	0.00026	0.00232	1.90 (12061,102,1868,30)	[+] Show genes	NO
GO:0051188	cofactor biosynthetic process	0.000261	0.00232	2.19 (12061,62,1868,21)	[+] Show genes	NO
GO:0043069	negative regulation of programmed cell death	0.000281	0.0025	2.66 (12061,34,1868,14)	[+] Show genes	NO
GO:0060548	negative regulation of cell death	0.000281	0.00249	2.66 (12061,34,1868,14)	[+] Show genes	NO
GO:0009767	photosynthetic electron transport chain	0.000289	0.00255	4.84 (12061,8,1868,6)	[+] Show genes	NO
GO:0009962	regulation of flavonoid biosynthetic process	0.00029	0.00255	2.27 (12061,54,1868,19)	[+] Show genes	NO
GO:0008654	phospholipid biosynthetic process	0.000295	0.00257	1.67 (12061,170,1868,44)	[+] Show genes	NO
GO:0048585	negative regulation of response to stimulus	0.000299	0.0026	1.96 (12061,89,1868,27)	[+] Show genes	YES
GO:0032879	regulation of localization	0.000307	0.00266	2.46 (12061,42,1868,16)	[+] Show genes	NO
GO:0009891	positive regulation of biosynthetic process	0.00032	0.00277	1.72 (12061,146,1868,39)	[+] Show genes	NO
GO:0009851	auxin biosynthetic process	0.000328	0.00282	2.87 (12061,27,1868,12)	[+] Show genes	NO
GO:0009850	auxin metabolic process	0.000328	0.00281	2.87 (12061,27,1868,12)	[+] Show genes	NO
GO:0006767	water-soluble vitamin metabolic process	0.000392	0.00335	4.11 (12061,11,1868,7)	[+] Show genes	NO
GO:0042364	water-soluble vitamin biosynthetic process	0.000392	0.00334	4.11 (12061,11,1868,7)	[+] Show genes	NO
GO:0006576	cellular biogenic amine metabolic process	0.000403	0.00342	2.58 (12061,35,1868,14)	[+] Show genes	NO
GO:0044106	cellular amine metabolic process	0.000403	0.00341	2.58 (12061,35,1868,14)	[+] Show genes	NO
GO:0006569	tryptophan catabolic process	0.00042	0.00354	2.96 (12061,24,1868,11)	[+] Show genes	NO
GO:0042436	indole-containing compound catabolic process	0.00042	0.00352	2.96 (12061,24,1868,11)	[+] Show genes	NO
GO:0046218	indolalkylamine catabolic process	0.00042	0.00351	2.96 (12061,24,1868,11)	[+] Show genes	NO
GO:0006952	defense response	0.000433	0.00361	1.39 (12061,432,1868,93)	[+] Show genes	YES
GO:0009611	response to wounding	0.000453	0.00376	1.97 (12061,82,1868,25)	[+] Show genes	NO
GO:0042435	indole-containing compound biosynthetic process	0.000493	0.00408	2.77 (12061,28,1868,12)	[+] Show genes	NO
GO:0009617	response to bacterium	0.000496	0.00409	1.93 (12061,87,1868,26)	[+] Show genes	YES
GO:0009117	nucleotide metabolic process	0.000543	0.00446	1.57 (12061,205,1868,50)	[+] Show genes	NO
GO:0006753	nucleoside phosphate metabolic process	0.000611	0.00501	1.57 (12061,206,1868,50)	[+] Show genes	NO
GO:0006721	terpenoid metabolic process	0.000616	0.00503	2.03 (12061,70,1868,22)	[+] Show genes	NO
GO:0070838	divalent metal ion transport	0.000633	0.00515	2.15 (12061,57,1868,19)	[+] Show genes	NO
GO:0072511	divalent inorganic cation transport	0.000633	0.00513	2.15 (12061,57,1868,19)	[+] Show genes	NO
GO:0035304	regulation of protein dephosphorylation	0.000645	0.00521	2.84 (12061,25,1868,11)	[+] Show genes	NO
GO:0009893	positive regulation of metabolic process	0.000661	0.00532	1.67 (12061,151,1868,39)	[+] Show genes	NO
GO:0022607	cellular component assembly	0.000738	0.00592	1.60 (12061,182,1868,45)	[+] Show genes	NO
GO:0055086	nucleobase-containing small molecule metabolic process	0.000741	0.00592	1.54 (12061,218,1868,52)	[+] Show genes	NO
GO:0018130	heterocycle biosynthetic process	0.000784	0.00625	1.46 (12061,287,1868,65)	[+] Show genes	NO
GO:0034284	response to monosaccharide	0.000872	0.00692	2.15 (12061,54,1868,18)	[+] Show genes	NO
GO:0071395	cellular response to jasmonic acid stimulus	0.000872	0.0069	2.15 (12061,54,1868,18)	[+] Show genes	NO
GO:0009867	jasmonic acid mediated signaling pathway	0.000872	0.00687	2.15 (12061,54,1868,18)	[+] Show genes	NO
GO:0009750	response to fructose	0.000934	0.00734	2.20 (12061,50,1868,17)	[+] Show genes	NO
GO:0006568	tryptophan metabolic process	0.000964	0.00755	2.73 (12061,26,1868,11)	[+] Show genes	NO
GO:0006586	indolalkylamine metabolic process	0.000964	0.00752	2.73 (12061,26,1868,11)	[+] Show genes	NO
GO:0035303	regulation of dephosphorylation	0.000964	0.0075	2.73 (12061,26,1868,11)	[+] Show genes	NO

## Sheet: Function
GO term	Description	P-value	FDR q-value	Enrichment (N, B, n, b)	Genes	NAM
GO:0005215	transporter activity	4.71e-06	0.00486	1.57 (12061,365,1868,89)	[+] Show genes	NO
GO:0003824	catalytic activity	4.06e-05	0.021	1.16 (12061,2591,1868,467)	[+] Show genes	NO
GO:0022804	active transmembrane transporter activity	7.39e-05	0.0254	1.89 (12061,123,1868,36)	[+] Show genes	NO
GO:0042578	phosphoric ester hydrolase activity	0.000144	0.0371	1.85 (12061,122,1868,35)	[+] Show genes	NO
GO:0015291	secondary active transmembrane transporter activity	0.000209	0.0431	2.09 (12061,74,1868,24)	[+] Show genes	NO
GO:0015294	solute:cation symporter activity	0.000417	0.0717	2.48 (12061,39,1868,15)	[+] Show genes	NO
GO:0015293	symporter activity	0.000417	0.0615	2.48 (12061,39,1868,15)	[+] Show genes	NO
GO:0016787	hydrolase activity	0.00046	0.0594	1.26 (12061,886,1868,173)	[+] Show genes	NO
GO:0016645	oxidoreductase activity, acting on the CH-NH group of donors	0.000574	0.0658	6.46 (12061,4,1868,4)	[+] Show genes	NO
GO:0022857	transmembrane transporter activity	0.000816	0.0842	1.50 (12061,245,1868,57)	[+] Show genes	NO

## Sheet: Component
GO term	Description	P-value	FDR q-value	Enrichment (N, B, n, b)	NAM
GO:0009536	plastid	1.92e-27	5.56e-25	1.62 (12061,1625,1868,407)	YES
GO:0009507	chloroplast	2.39e-27	3.46e-25	1.62 (12061,1590,1868,400)	YES
GO:0044435	plastid part	3.29e-26	3.18e-24	2.35 (12061,413,1868,150)	NO
GO:0044434	chloroplast part	1.12e-25	8.12e-24	2.34 (12061,409,1868,148)	NO
GO:0044436	thylakoid part	2.52e-15	1.46e-13	2.84 (12061,134,1868,59)	NO
GO:0009534	chloroplast thylakoid	2.64e-14	1.28e-12	3.95 (12061,54,1868,33)	NO
GO:0031976	plastid thylakoid	2.64e-14	1.09e-12	3.95 (12061,54,1868,33)	NO
GO:0031984	organelle subcompartment	2.64e-14	9.56e-13	3.95 (12061,54,1868,33)	NO
GO:0009579	thylakoid	2.87e-14	9.24e-13	3.19 (12061,91,1868,45)	NO
GO:0016020	membrane	3.81e-14	1.1e-12	1.38 (12061,1957,1868,417)	YES
GO:0044444	cytoplasmic part	1.97e-13	5.2e-12	1.22 (12061,4151,1868,782)	YES
GO:0034357	photosynthetic membrane	3.72e-12	8.99e-11	2.83 (12061,105,1868,46)	NO
GO:0042651	thylakoid membrane	3.72e-12	8.3e-11	2.83 (12061,105,1868,46)	NO
GO:0055035	plastid thylakoid membrane	4.74e-12	9.81e-11	2.85 (12061,102,1868,45)	NO
GO:0009535	chloroplast thylakoid membrane	4.74e-12	9.16e-11	2.85 (12061,102,1868,45)	NO
GO:0005886	plasma membrane	6.13e-11	1.11e-09	1.40 (12061,1386,1868,300)	NO
GO:0044446	intracellular organelle part	4.88e-10	8.32e-09	1.45 (12061,1035,1868,232)	YES
GO:0044422	organelle part	5.36e-10	8.64e-09	1.45 (12061,1036,1868,232)	YES
GO:0009526	plastid envelope	1.51e-08	2.3e-07	2.06 (12061,185,1868,59)	NO
GO:0009941	chloroplast envelope	3.19e-08	4.62e-07	2.04 (12061,184,1868,58)	NO
GO:0009570	chloroplast stroma	1.12e-07	1.54e-06	2.00 (12061,181,1868,56)	NO
GO:0009532	plastid stroma	1.12e-07	1.47e-06	2.00 (12061,181,1868,56)	NO
GO:0031975	envelope	8.1e-07	1.02e-05	1.86 (12061,205,1868,59)	NO
GO:0031967	organelle envelope	8.1e-07	9.79e-06	1.86 (12061,205,1868,59)	NO
GO:0005576	extracellular region	1.01e-06	1.17e-05	1.35 (12061,1026,1868,214)	NO
GO:0009543	chloroplast thylakoid lumen	3.6e-06	4.01e-05	3.06 (12061,38,1868,18)	NO
GO:0031978	plastid thylakoid lumen	3.6e-06	3.86e-05	3.06 (12061,38,1868,18)	NO
GO:0005773	vacuole	6.17e-06	6.39e-05	1.79 (12061,198,1868,55)	YES
GO:0031977	thylakoid lumen	8.9e-06	8.9e-05	2.91 (12061,40,1868,18)	NO
GO:0010287	plastoglobule	2.7e-05	0.000261	3.74 (12061,19,1868,11)	NO
GO:0048046	apoplast	0.00031	0.0029	2.12 (12061,67,1868,22)	NO
GO:0005794	Golgi apparatus	0.000749	0.00679	1.41 (12061,362,1868,79)	NO
